# Supplementary material for: Silencing of B4Galnt1 Gene Prevents GM2 Accumulation in Tay-Sachs Cells
Source: Hindawi journal article supplement (doi:10.1155/2024/1099113), 2024-03-26
Supplement: f1 [file 1099113.f1.pdf]

## Supplementary Figure

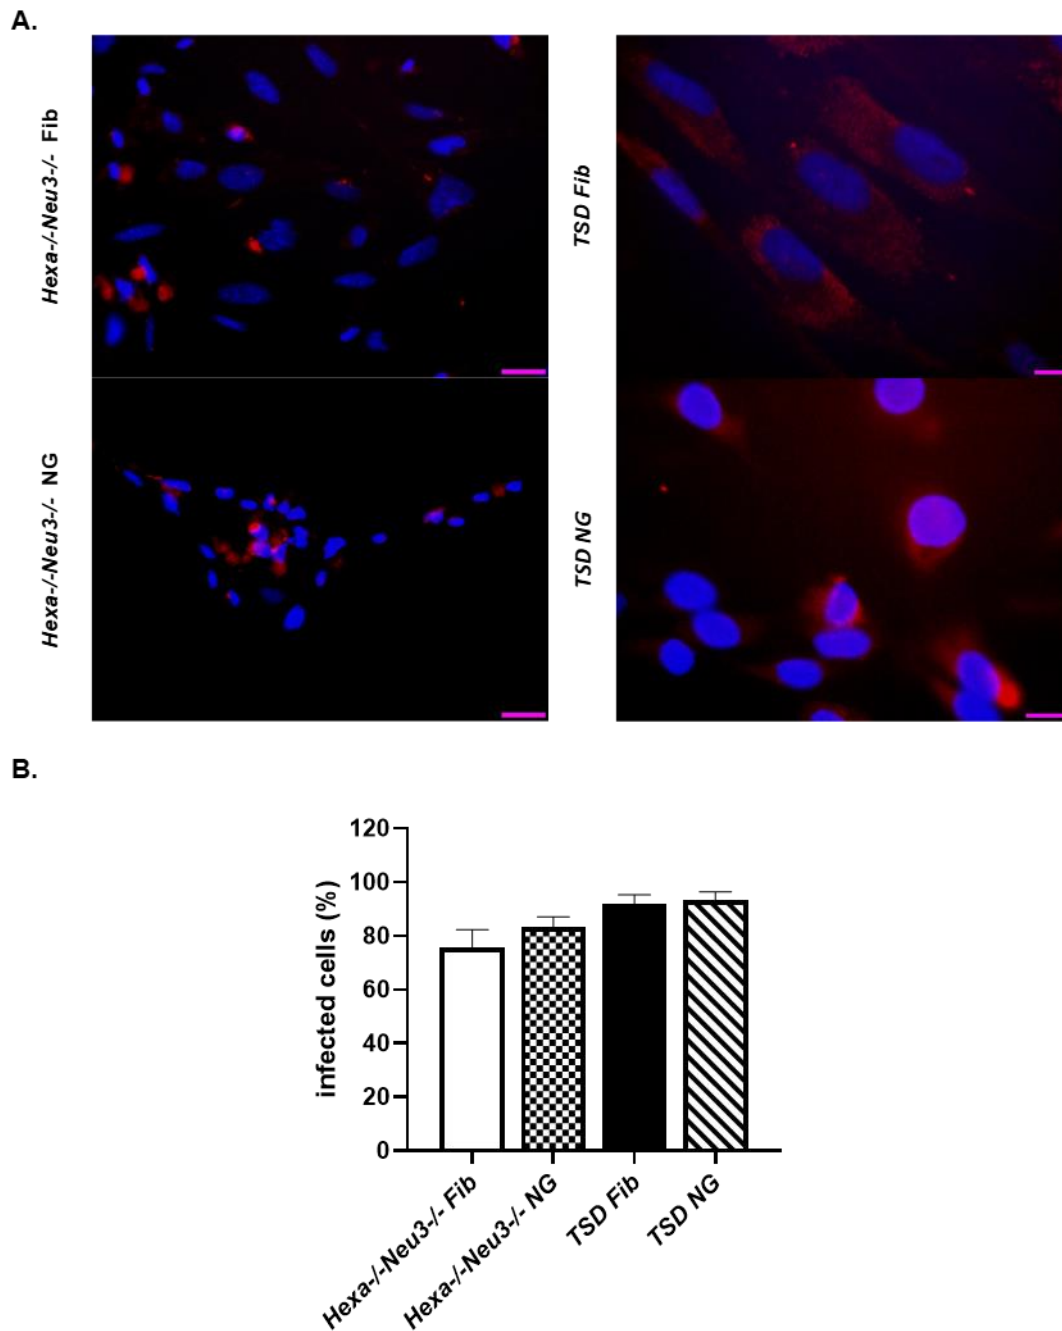

**Figure S1:** Immunocytochemical analysis of transfection efficiency of m-shRNA1 in *Hexa*<sup>-/-</sup>/*Neu3*<sup>-/-</sup> mouse fibroblast, *Hexa*<sup>-/-</sup>/*Neu3*<sup>-/-</sup> mouse neuroglia, TSD human fibroblast and TSD human neuroglia. Cells in 24-well plates were infected with  $6 \times 10^9$  viral particles of AAV9-m-shRNA1 expressing the mCherry reporter gene (red). The intensity of fluorescence was quantified using Fiji imaging software and the percent of transduced cells 72 hours post-transduction was calculated (n = 3, Scale bar represents 100 $\mu$ m).
